# Supplementary material
Source: PubMed Central journal article supplement (PMC6072555)
Supplement: NIHMS970115-supplement-2.pdf [file NIHMS970115-supplement-2.pdf]

| <b>Primer Name</b> | <b>Sequence 5' – 3'</b>           |
|--------------------|-----------------------------------|
| CTNNA2 sgRNA-F     | CAC CGC CCG AAC GCC ATC ATA CAC C |
| CTNNA2 sgRNA-R     | CGG TGT ATG ATG GCG TTC GGG CAA A |
| CTNNA2 qRT-F       | CAT CAT GGC GCA ACT ACC           |
| CTNNA2 qRT-R       | TGA TCA GCC ACA GCA CGA G         |
| AXIN2 qRT-F        | TAC ACT CCT TAT TGG GCG ATC A     |
| AXIN2 qRT-R        | TTG GCT ACT CGT AAA GTT TTG GT    |
| ID2 qRT-F          | AGT CCC GTG AGG TCC GTT AG        |
| ID2 qRT-R          | AGT CGT TCA TGT TGT ATA GCA GG    |
| LEF1 qRT-F         | ATG TCA ACT CCA AAC AAG GCA       |
| LEF1 qRT-R         | CCC GGA GAC AAG GGA TAA AAA GT    |
| GAPDH qRT-F        | CTG CAC CAC CAA CTG CTT AG        |
| GAPDH qRT-R        | GAG GCA GGG ATG ATG TTC TG        |

**Supplementary Table 1. Primers used in the study**
